# Supplementary material for: Copper and Cadmium Accumulation and Phytorextraction Potential of Native and Cultivated Plants Growing around a Copper Smelter
Source: MDPI journal article supplement (doi:10.3390/agronomy13122874), 2023-11-22
Supplement: s1 [file s1]

**Table S1** The codes, latitude, and longitude of plants with paired soils

| Codes | Plant species                                  | Family         | Longitude    | Latitude    |
|-------|------------------------------------------------|----------------|--------------|-------------|
| S1    | <i>Oenothera biennis</i> L.                    | Brassicaceae   | 117.24439182 | 28.33082216 |
| S2    | <i>Cyclosorus interruptus</i>                  | Polypodiaceae  | 117.24405919 | 28.33019894 |
| S3    | <i>Verbena officinalis</i> L.                  | Verbenaceae    | 117.24268614 | 28.33155957 |
| S4    | <i>Xanthium strumarium</i> L.                  | Asteraceae     | 117.24435970 | 28.33155886 |
| S5    | <i>Solidago canadensis</i> L.                  | Asteraceae     | 117.24390908 | 28.33121903 |
| S6    | <i>Saccharum arundinaceum</i> Retz.            | Poaceae        | 117.24277204 | 28.33257955 |
| S7    | <i>Pteris multifida</i> Poir.                  | Pteridaceae    | 117.24251456 | 28.33233411 |
| S8    | <i>Pteris vittata</i> L.                       | Pteridaceae    | 117.24369447 | 28.33057688 |
| S9    | <i>Phytolacca acinosa</i> Roxb.                | Phytolaccaceae | 117.24384463 | 28.33019903 |
| S10   | <i>Artemisia sieversiana</i> Ehrhart ex Willd. | Asteraceae     | 117.24260035 | 28.33195628 |
| S11   | <i>Pennisetum sinense</i> Roxb.                | Poaceae        | 117.21621517 | 28.32462520 |
| S12   | <i>Lophatherum gracile</i> Brongn.             | Poaceae        | 117.21538736 | 28.32567708 |
| S13   | <i>Elsholtzia splendens</i> Nakai              | Lamiaceae      | 117.21491314 | 28.32585010 |
| S14   | <i>Canna indica</i> L.                         | Cannaceae      | 117.21464790 | 28.32578671 |
| S15   | <i>Aster subulatus</i> Michx.                  | Asteraceae     | 117.21613214 | 28.32489686 |
| S16   | <i>Sedum plumbizincicola</i>                   | Crassulaceae   | 117.21481397 | 28.32533311 |
| S17   | <i>Mosla chinensis</i> Maxim                   | Lamiaceae      | 117.21563378 | 28.32477002 |
| S18   | <i>Vetiveria zizanioides</i> L.                | Poaceae        | 117.21588032 | 28.32536001 |

Note: The cultivated plants were grown in a demonstration zone and they included *Pennisetum sinense* Roxb. (energy plant), *Sedum plumbizincicola* (cadmium hyper-accumulator), *Elsholtzia splendens* Nakai (copper tolerant plant), and *Canna indica* L. (landscape plant).

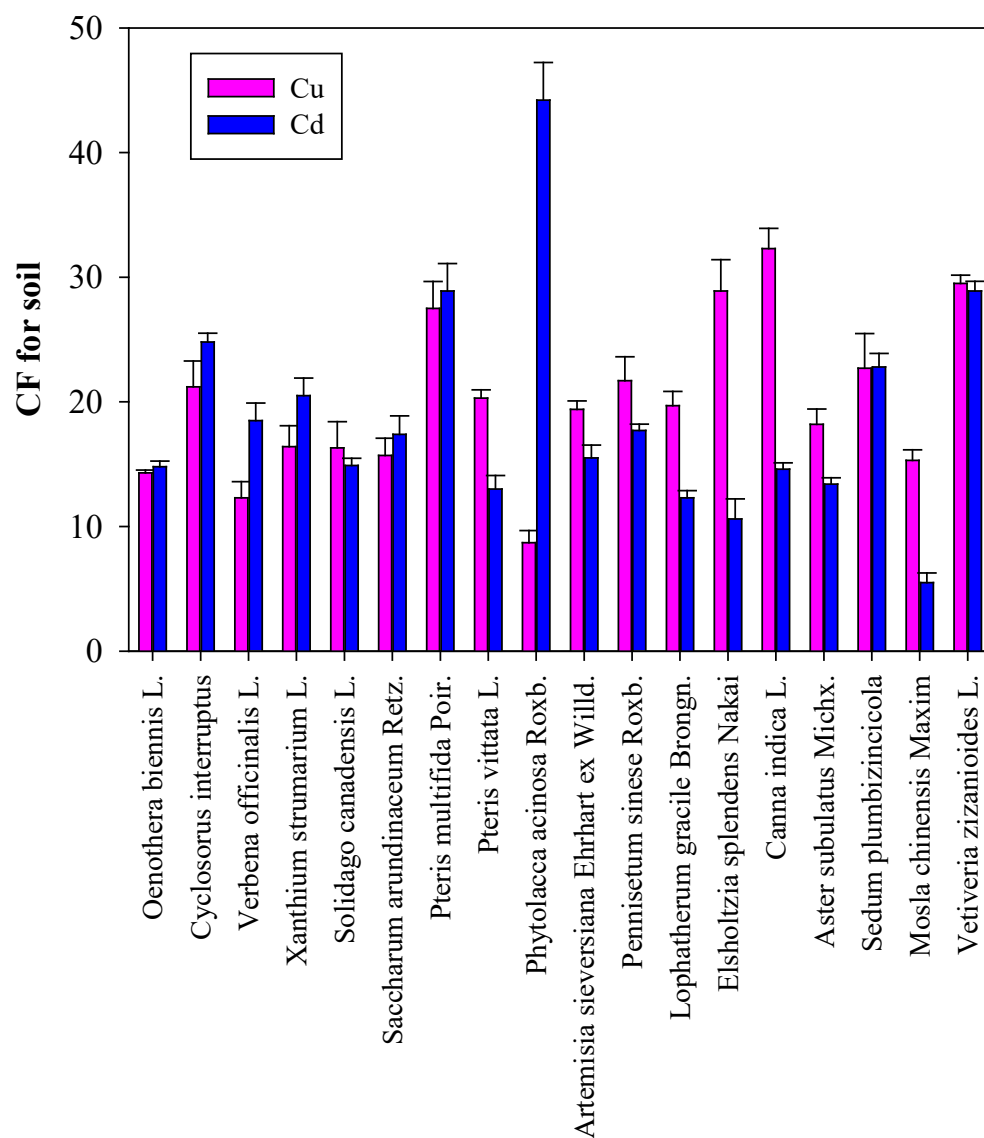

**Fig. S1** The CF values for copper and cadmium around the copper smelter

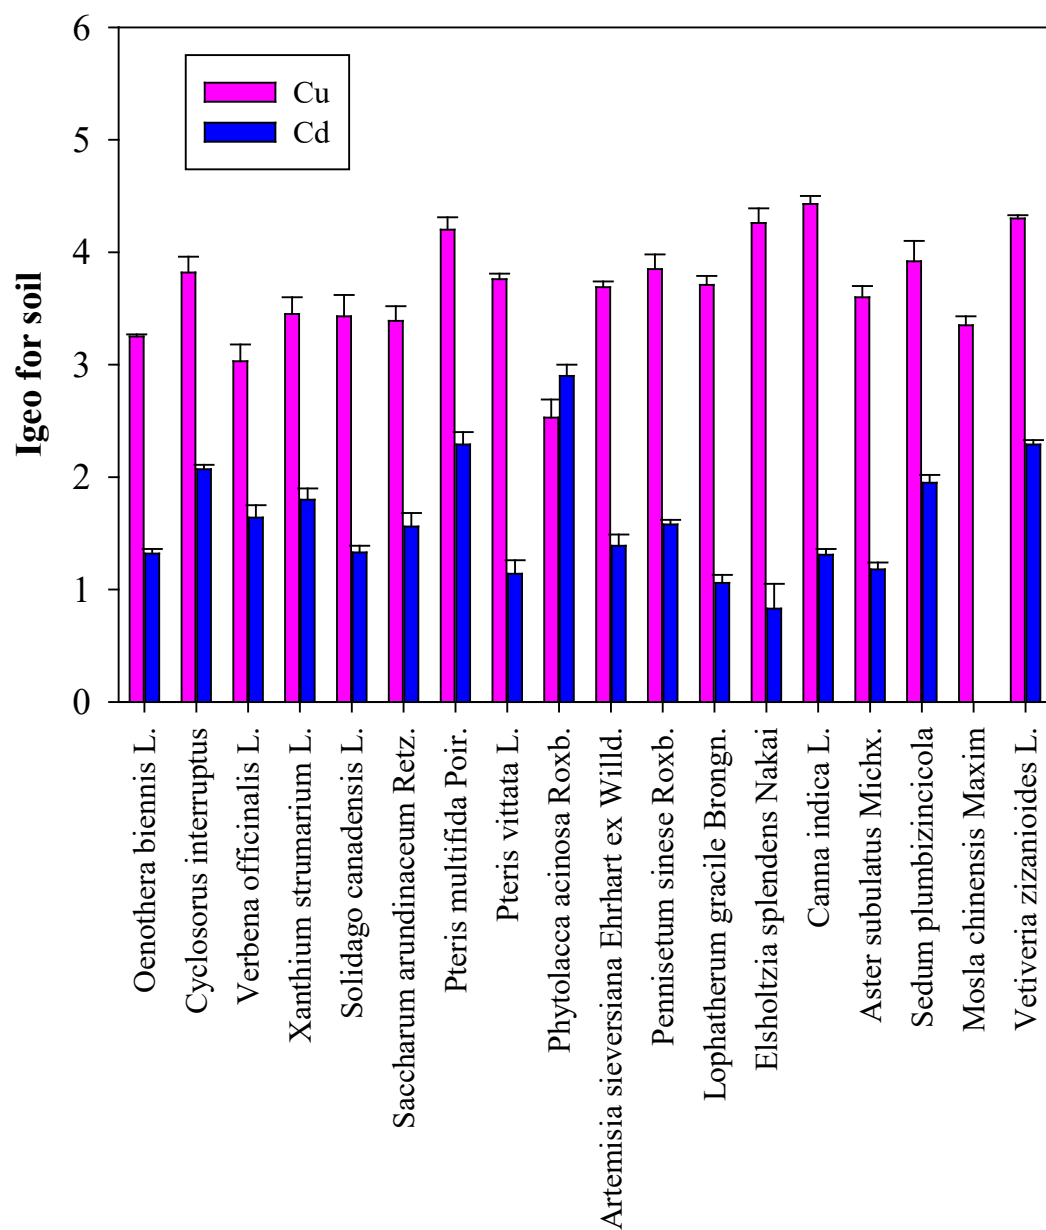

**Fig. S2** The Igeo values for copper and cadmium around the copper smelter

**Table S2** Concentrations of copper (mg/kg) and cadmium (mg/kg) in roots, shoots, and leaves.

| Species of plants                              | Root-Cu     | Shoot-Cu    | Leaf-Cu      | Root-Cd        | Shoot-Cd    | Leaf-Cd     |
|------------------------------------------------|-------------|-------------|--------------|----------------|-------------|-------------|
| <i>Oenothera biennis</i> L.                    | 45.1±2.65fg | 7.2±1.09h   | 66.8±6.94de  | 2.21±0.16defgh | 0.85±0.02fg | 1.82±0.32d  |
| <i>Cyclosorus interruptus</i>                  | 149±1.29d   | 37.4±1.72f  | 60.2±2.84def | 3.41±0.12def   | 4.09±0.04c  | 1.97±0.13cd |
| <i>Verbena officinalis</i> L.                  | 47.2±5.19fg | 10.4±3.29h  | 93.1±6.04c   | 1.99±0.35efgh  | 0.32±0.04g  | 2.45±0.35cd |
| <i>Xanthium strumarium</i> L.                  | 94±15ef     | 23.8±3.61fg | 74.4±4.01d   | 2.65±0.32defg  | 3.12±1.67cd | 1.33±0.21d  |
| <i>Solidago canadensis</i> L.                  | 47.8±10.9fg | 4.2±1.16h   | 46.7±1.28fgh | 1.15±0.07gh    | 0.79±0.32fg | 1.15±0.02d  |
| <i>Saccharum arundinaceum</i> Retz.            | 23.5±2.26g  | 4.3±1.02h   | 8.1±0.26j    | 1.42±0.05gh    | 1.68±0.2ef  | 1.53±0.58d  |
| <i>Pteris multifida</i> Poir.                  | 71.7±9.66ef | 25±4.39f    | 31.1±4.25hi  | 3.97±0.43d     | 3.71±0.08c  | 4.82±0.47b  |
| <i>Pteris vittata</i> L.                       | 139.7±8.36d | 33.3±0.28f  | 57±2.19ef    | 1.81±0.06fgh   | 2.51±0.05de | 2.16±0.11cd |
| <i>Phytolacca acinosa</i> Roxb.                | 27.3±2.34g  | 5.8±3.41h   | 50.1±1.9efg  | 19.95±0.4a     | 5.77±0.17b  | 4.72±0.34b  |
| <i>Artemisia sieversiana</i> Ehrhart ex Willd. | 156±10d     | 9.1±1.2h    | 40.4±1.01ghi | 3.55±0.41def   | 3.68±0.53c  | 3.98±0.01d  |
| <i>Pennisetum sinese</i> Roxb.                 | 244±17c     | 106±8.3c    | 130.5±7.74b  | 3.73±0.35de    | 3.63±0.02c  | 1.78±0.4d   |
| <i>Lophatherum gracile</i> Brongn.             | 27.9±0.07g  | 11.6±0gh    | 32.3±1.3hi   | 0.92±0.01gh    | 1.42±0.07f  | 0.34±0.08d  |
| <i>Elsholtzia splendens</i> Nakai              | 357±35.8a   | 219±15a     | 269±25.37a   | 2.61±0.05defg  | 1.52±0.1f   | 1.3±0.3d    |
| <i>Canna indica</i> L.                         | 312±14.6b   | 26.7±1.09f  | 28.5±1.05i   | 1.97±0.3efgh   | 1.11±0.15fg | 0.41±0.09d  |
| <i>Aster subulatus</i> Michx.                  | 75.7±20.8ef | 27.3±0.11f  | 39.5±1.27ghi | 1.92±0.54efgh  | 0.95±0.09fg | 1.74±0.02d  |
| <i>Sedum plumbizincicola</i>                   | 131.1±7.51d | 73.2±8.47d  | 59.7±1.13def | 16.43±3.02b    | 34.24±0.09a | 18.53±3.66a |
| <i>Mosla chinensis</i> Maxim                   | 85±0.19ef   | 50.5±3.68e  | 27.6±0.44i   | 0.4±0.05h      | 1.33±0.02fg | 1.17±0.07d  |
| <i>Vetiveria zizanioides</i> L.                | 297±40b     | 177±13b     | 102.8±6.93c  | 5.83±0.59c     | 1.52±0.34f  | 1.83±0.01d  |
| Mean value                                     | 129         | 47.3        | 67.7         | 4.22           | 4.01        | 2.95        |

Mean ( $n = 3$ ) and standard error followed by different letters indicated significant differences ( $p < 0.05$ )
